# 1 Genomics-Based Identification of Microorganisms in Human 2 Ocular Body Fluid

3  
4  
5 **Philipp Kirstahler<sup>1</sup>, Søren Solborg Bjerrum<sup>2</sup>, Alice Friis-Møller<sup>3</sup>, Morten la Cour<sup>2</sup>,**  
6 **Frank M. Aarestrup<sup>1</sup>, Henrik Westh<sup>3,4</sup>, and Sünje Johanna Pamp<sup>1,\*</sup>**

7  
8 <sup>1</sup>Research Group for Genomic Epidemiology, Technical University of Denmark, Kgs.  
9 Lyngby, Denmark

10 <sup>2</sup>Department of Ophthalmology, Rigshospitalet, Glostrup, Denmark

11 <sup>3</sup>Department of Clinical Microbiology, Hvidovre Hospital, Copenhagen, Denmark

12 <sup>4</sup>Department of Clinical Medicine, Faculty of Health and Medical Sciences, University of  
13 Copenhagen, Copenhagen, Denmark

14  
15 \*corresponding author sjpa@food.dtu.dk  
16  
17

## 18 **ABSTRACT**

19  
20 Advances in genomics have the potential to revolutionize clinical diagnostics. Here, we  
21 examine the microbiome of vitreous (intraocular body fluid) from patients who developed  
22 endophthalmitis following cataract surgery or intravitreal injection. Endophthalmitis is an  
23 inflammation of the intraocular cavity and can lead to a permanent loss of vision. As  
24 controls, we included vitreous from endophthalmitis-negative patients, balanced salt  
25 solution used during vitrectomy, and DNA extraction blanks. We compared two DNA  
26 isolation procedures and found that an ultraclean production of reagents appeared to  
27 reduce background DNA in these low microbial biomass samples. We created a curated  
28 microbial genome database (>5700 genomes) and designed a metagenomics workflow  
29 with filtering steps to reduce DNA sequences originating from: i) human hosts, ii)  
30 ambiguousness/contaminants in public microbial reference genomes, and iii) the  
31 environment. Our metagenomic read classification revealed in nearly all cases the same  
32 microorganism than was determined in cultivation- and mass spectrometry-based  
33 analyses. For some patients, we identified the sequence type of the microorganism and  
34 antibiotic resistance genes through analyses of whole genome sequence (WGS)  
35 assemblies of isolates and metagenomic assemblies. Together, we conclude that  
36 genomics-based analyses of human ocular body fluid specimens can provide actionable  
37 information relevant to infectious disease management.

## 38 Introduction

39 Genomics-based analyses of patient specimens have the potential to provide actionable information  
40 that could facilitate faster and possibly more precise clinical diagnoses and guide treatment  
41 strategies in infectious diseases. A medical condition where a faster and more precise diagnosis  
42 could make a difference in clinical outcomes is endophthalmitis. Endophthalmitis is an acute  
43 intraocular inflammation that can lead to a permanent loss of vision. It often develops in response to  
44 microorganisms (usually bacteria and fungi) that enter the eye following eye surgery such as  
45 cataract surgery and intravitreal injection. The treatment strategy as well as visual outcome depends  
46 in part on the identity of the causative agents. For example, endophthalmitis cases involving  
47 coagulase-negative staphylococci have a better prognosis than cases involving enterococci or  
48 streptococci<sup>1</sup>. Often, the involving bacteria appear to originate from the patients' own microbiota,  
49 but may also be introduced through contaminated solutions or instruments used during eye surgery  
50<sup>2,3</sup>. Endophthalmitis is an acute emergency and therefore clinicians start with a treatment before  
51 obtaining information about the identity of the causing microbial agent. It is anticipated that in the  
52 future, a more rapid determination of the identity of the causing agents and their antimicrobial  
53 resistance profiles using diagnostic metagenomics could facilitate the application of more precise  
54 treatments and reduce blindness.

55  
56 Cataract is a condition in which the lens of the eye becomes progressively opaque and is one of the  
57 major causes of reversible visual loss. It is estimated that every year 10 million cataract surgeries  
58 are performed around the world<sup>4</sup>. The risk of endophthalmitis after cataract surgery is 1.4-4 per  
59 10,000 cataract surgeries in the US and Denmark, and can be higher in other countries<sup>1,5,6</sup>. About  
60 1/3 of the eyes with endophthalmitis in cataract patients remain blind after treatment<sup>7</sup>.

61  
62 Intravitreal injection with anti-vascular endothelial growth factor (anti-VEGF) has revolutionized  
63 the treatment of wet age-related macular degeneration, as well as diabetic maculopathy, and retinal  
64 vein occlusions during the last decade. It is the fastest growing procedure in ophthalmology and it  
65 was estimated that the number of intravitreal injections in the US would reach nearly 6 million in  
66 2016<sup>8</sup>. The risk of endophthalmitis after intravitreal injection is approximately 4.9 per 10,000  
67 intravitreal injections<sup>9</sup>.

68  
69 The diagnosis and treatment of endophthalmitis is performed by vitrectomy surgery or a vitreous  
70 tap<sup>10</sup>. A vitrectomy is a procedure in which the vitreous body of the eye, which is the immobile gel-  
71 like fluid that occupies the space between the lens and retina, is aspirated and replaced by balanced  
72 salt solution. A vitreous tap is a more simple procedure where the vitreous is aspirated without  
73 being replaced by balanced salt solution. In both procedures, antibiotics, such as vancomycin  
74 combined with ceftazidime, are being injected into the vitreous body to treat the infection. The  
75 vitreous is often examined for infectious agents in the clinical laboratory using cultivation-based  
76 techniques.

77  
78 In the clinical setting it is challenging to distinguish between infectious endophthalmitis and non-  
79 infectious ("sterile") endophthalmitis. Studies have shown that the proportion of culture-positive  
80 cases can be as low as 39% after cataract surgery and 52% after intravitreal injection<sup>9,11</sup>.  
81 Polymerase chain reaction can increase the rate of identifying the microorganisms by 20%<sup>12</sup>, but in  
82 many endophthalmitis cases a causative agent cannot be identified. It is also unclear, whether the  
83 vitreous in endophthalmitis may contain multiple microorganisms that are not all being detected  
84 with the current methods. Furthermore, from a clinical perspective it is of importance to have a

85 method that facilitates the identification of the cases of non-infectious endophthalmitis. Non-  
86 infectious endophthalmitis can present as a variant of TASS (toxic anterior segment syndrome), and  
87 these patients may benefit from steroid instead of antibiotic treatment to obtain a better visual  
88 outcome<sup>13</sup>.

89  
90 Genomics approaches have the potential to revolutionize clinical diagnostic and therapeutic  
91 approaches in particular in the area of infectious diseases. Using shotgun metagenomic sequencing,  
92 a range of microorganisms and possible causing agents (e.g. bacteria, archaea, fungi, protozoa,  
93 viruses) can be identified<sup>14,15</sup>. In addition, upon cultivation-based isolation of microorganisms from  
94 the patient specimen, these can be subjected to whole genome sequencing (WGS) and *in silico*-  
95 determination of their taxonomic affiliation, phylogenetic relationships, potential antibiotic  
96 resistance genes, and virulence-associated genes<sup>16,17</sup>.

97  
98 Here, we perform metagenomic sequencing of vitreous specimens obtained from patients with  
99 endophthalmitis and a range of control samples. We evaluate two DNA isolation procedures for  
100 vitreous, and describe a bioinformatics workflow for data analysis and identification of potential  
101 infectious agents. The workflow includes *in silico* filtering steps for the removal of human DNA  
102 sequences, ambiguous and contaminant sequences in reference genomes from public repositories,  
103 and background DNA detected in control samples. We compare the metagenomics-based results  
104 with the results from the routine clinical cultivation- and mass spectrometry-based analysis, as well  
105 as to WGS-based identification of isolates obtained from the vitreous. Our findings suggest that  
106 metagenomics analysis together with WGS-based analysis is suitable for the identification of the  
107 potential infectious agents from human ocular body fluid, and in the future could guide therapeutic  
108 strategies including targeted antimicrobial therapy and the choice of steroids.

109

## 110 **Results**

### 111 **Study design and metagenomic sequencing**

112 To evaluate the use of shotgun metagenomic sequencing for the identification of potential disease-  
113 causing agents in postoperative endophthalmitis, we collected vitreous during vitrectomy from 14  
114 patients with endophthalmitis (7 post cataract surgery, 7 post intravitreal injection) (Figure 1,  
115 Supplementary Table S1). As control, we obtained vitreous from 7 patients without endophthalmitis  
116 during macula hole surgery. Additional controls included 6 balanced salt solution (BSS) aliquots, of  
117 which 3 originated from individual bottles (BSS-B), and 3 from the vitrectomy BSS infusion lines  
118 (to be inserted into the eye) after the bottle had been connected to the vitrectomy system (BSS-S)  
119 (Figure 1). As there exist no standard procedure for the isolation of DNA from vitreous, we  
120 examined two procedures using the QIAamp DNA Mini Kit (QIA) and QIAamp UCP Pathogen  
121 Mini kit (UCP), and 4 extraction (blank) controls were included per kit (Figure 1).

122

123 The 62 samples were sequenced using Illumina MiSeq sequencing technology and a total of 90.6  
124 million raw read-pairs were obtained. The average number of read-pairs after quality control for the  
125 endophthalmitis patients were 2.1/2.3 million read-pairs (QIA/UCP), and for the endophthalmitis-  
126 negative vitreous samples 1.0/0.6 million read-pairs (QIA/UCP). The average number of read-pairs  
127 for the BSS samples were 52,899/6,067 (QIA/UCP), and for the DNA extraction controls  
128 20,931/3,134 (QIA/UCP). Overall, more read-pairs were obtained on average for the control  
129 samples when extracted with the QIA kit, while more read-pairs were obtained for the vitreous from  
130 the endophthalmitis patients when extracted with the UCP kit (Supplementary Fig. S1,  
131 Supplementary Table S2).

132

### 133 **Identification of human-affiliated DNA sequences**

134 In a first-pass analysis, in which we mapped the reads against a set of reference genomes, we  
135 detected a high number of reads affiliated with human DNA sequences, which was anticipated in  
136 particular in the endophthalmitis cases that can experience an infiltration of immune cells into the  
137 vitreous chamber. Hence, we implemented a 2-step filtering process to remove the reads affiliated  
138 with human genome sequences (Figure 2). In the first step we removed the reads that mapped to the  
139 human reference genome (GRCh8.p10). Due to the genetic individuality of humans some reads  
140 might not map to this reference genome, and therefore we removed in a second step all reads that  
141 aligned to any human DNA sequence entry in the NCBI nt database (Supplementary Fig. S2,  
142 Supplementary Table S2).

143

### 144 **Identification of ambiguous and contaminant DNA sequences in genomes from public 145 repositories**

146 In the initial first-pass analysis involving mapping of reads against reference genomes, we observed  
147 that some genomes recruited particular high numbers of reads. These included *Hammondia*  
148 *hammondi* strain H.H.34, *Alcanivorax hongdengensis* Strain A-11-3, *Toxoplasma gondii* ME49,  
149 and *Arthrobacter* sp. Soil736. Upon inspection of these genomes we found that the reads mapped  
150 only to specific genome sequence fragments such as short contigs and scaffolds (Supplementary  
151 Fig. S3). To examine why specific contigs and scaffolds recruited high numbers of reads, we  
152 aligned these against the nucleotide collection nt (NCBI). We found that the Top10 matches for  
153 most of these contigs and scaffolds included several human DNA sequence entries that are not part  
154 of the human reference genome GRCh8.p10 (Supplementary Table S3). While a few scaffolds of  
155 *Hammondia hammondi* strain H.H.34 aligned with human DNA sequences (e.g. scaffold  
156 NW\_008644893.1), many aligned to *Bradyrhizobium* spp. genomes in the nt database  
157 (Supplementary Table S3), indicating that human as well as microbial sequence contamination can  
158 be found in public genome assemblies.

159

### 160 **Construction of a curated microbial genome database**

161 Our analysis suggested that some microbial reference genomes contain ambiguous/contaminant  
162 sequences and we aimed at constructing a curated microbial genome database, devoid of these  
163 sequences to the extent possible. Removing these sequences could reduce the number of false  
164 positive hits that are the result of either contaminant sequences in the (incomplete) genome  
165 assemblies, or because highly similar sequence regions naturally exist across genera that result in  
166 the classification of reads to a different genus. We examined 5715 of the microbial reference and  
167 representative genomes (archaea, bacteria, fungi, protozoa) (Supplementary Table S4) and aligned  
168 all sequences  $\leq 10$  kb against the nucleotide collection nt (for a detailed description, see  
169 Supplementary Methods). A total of 70,478 ambiguous sequences (contigs and scaffolds) were  
170 identified, of which the majority were detected in incomplete microbial genomes. A total of 62% of  
171 all incomplete microbial genomes had sequences flagged as ambiguous (range: 1 - 10,590; average:  
172 28 sequence fragments). Ambiguous sequences were identified in 43% of all bacterial and 72% of  
173 all protozoan genomes, and on average comprised 0.36% and 0.84% of the total genome sequence,  
174 respectively (Table 1, and <https://figshare.com/s/a282670f1405eae232df>,  
175 <https://figshare.com/s/045b1252bd7555b50ef0>, <https://figshare.com/s/c42158cdee23f25489cd>)<sup>18</sup>.  
176 The ambiguous sequences were removed and the resulting reference microbial genome database  
177 contained a total of 5,751 genomes with 34 Tb (including 3.1 Tb for the human genome). The code  
178 for the creation of the curated microbial reference genome database is accessible from Github

179 (<https://github.com/philDTU/endoPublication>), and the curated microbial reference genomes can be  
180 downloaded from <ftp://ftp.cbs.dtu.dk/public/CGE/databases/CuratedGenomes>.

181

182

### 183 **Identification of contaminant (environmental background) DNA sequences in samples**

184 From the sequencing of DNA extraction (blank) control samples we obtained sequencing data,  
185 albeit at a lower frequency compared to the patient specimens (Supplementary Fig. S1). The *in*  
186 *silico* identification and removal of background DNA sequences are of critical importance,  
187 particularly from specimens where the potential infectious agent may be present in low abundance.  
188 We carefully examined the eight DNA extraction control samples and devise a list of the most  
189 abundant and frequent environmental contaminant taxa in these samples (Supplementary Table S5,  
190 Supplementary Fig. S4). We did not include taxa in the list that were occasionally observed in  
191 endophthalmitis-positive patients and that were detected at a higher abundance in these samples  
192 than in the respective DNA extraction controls. These non-contaminant taxa include *Enterococcus*  
193 *faecalis*, *Escherichia coli*, *Micrococcus luteus*, *Staphylococcus aureus*, and *Staphylococcus*  
194 *epidermidis* (Figure 3, and <https://figshare.com/s/a4fd9d84260e8456ab72>). The microbial  
195 composition patterns in the DNA extraction control samples appeared to be influenced by the  
196 choice of DNA isolation kit, the day of DNA extraction, and sequencing run (Supplementary Fig.  
197 S4). The contaminant taxa (Supplementary Table S5) were removed from the datasets of all  
198 endophthalmitis patients.

199

### 200 **The microbial composition in endophthalmitis-negative and balanced salt solution samples** 201 **is similar to DNA extraction controls**

202 The contaminant taxa that were identified in the DNA extraction controls were often present at  
203 similar abundances in the endophthalmitis-negative (vitreous control) and balanced salt solution  
204 samples (Figure 3, Supplementary Fig. S5). We found certain taxa to be specific for the DNA  
205 isolation method (QIA or UCP) in round C of DNA extractions (Supplementary Fig. S5,  
206 Supplementary Table S2). Samples processed using the QIA method contained *Pseudomonas* spp.,  
207 *Acinetobacter* spp., and *Janthinobacterium* spp. among others, and samples processed with the UCP  
208 method included mainly *Bradyrhizobium* spp. Other organisms appeared to be present across all  
209 samples (Supplementary Fig. S5). For example, *Cutibacterium acnes* and *Propionibacterium*  
210 *humerusii* were detected in most samples and they might represent environmental bacteria  
211 originating from the staff handling the samples or fomites such as the laboratory equipment and  
212 supplies.

213

### 214 **Microorganisms in endophthalmitis-positive patients as determined by metagenomics**

215 For 12 out of 14 endophthalmitis patients a dominant microorganism was identified in the vitreous  
216 (for all UCP-extracted, and most QIA-extracted specimens) using the read classification approach  
217 (Figure 4 and 5). These organisms included *Staphylococcus epidermidis* (six patients),  
218 *Enterococcus faecalis* (two patients), *Serratia marcescens* (one patient), *Paenibacillus* spp. (one  
219 patient), and *Staphylococcus hominis* (one patient). In one patient (C5), a number of different  
220 organisms were identified, most dominantly *E. coli* in the UCP-extracted specimen (>3000 reads),  
221 *Moraxella catarrhalis* (11 reads) in the QIA-extracted specimen, and *Micrococcus luteus* with 9  
222 and 45 reads in QIA and UCP-extracted samples, respectively (Figure 4 and 5, and  
223 <https://figshare.com/s/5feabfad1d8c495bf7a3>). For two additional patients, *Commamonas*  
224 *testosteronii* and *Escherichia coli*, or *Caulobacter* spp. were identified as the most dominant  
225 organisms respectively (C1, I7), however, these were only represented by <25 reads. In the seven  
226 patients that contracted endophthalmitis following cataract surgery, the most frequent bacteria were

227 *Enterococcus faecalis* (two patients), *Staphylococcus epidermidis* (two patients), and *Serratia*  
228 *marcescens* (one patient). In the seven patients with endophthalmitis following intravitreal  
229 injection, the most frequent bacteria were *Staphylococcus epidermidis* (four patients), *Paenibacillus*  
230 spp. (one patient), and *Staphylococcus hominis* (one patient) (Figure 5). Overall, potential causing  
231 agents were identified with 58 reads (*Paenibacillus* spp.) as a lower bound in patient I2, and  
232 2,999,838 reads as the highest detected read count (*Staphylococcus epidermidis*) in patient I4. The  
233 presence of the two most frequently detected bacteria, *Staphylococcus epidermidis* and  
234 *Enterococcus faecalis*, in the vitreous fluid was also verified using targeted PCR assays (See  
235 Supplementary Methods, and <https://figshare.com/s/0e8a98f436f07efc4dd5>).  
236

237 In addition to the read classification approach, we constructed metagenomic assemblies for the  
238 individual samples and characterized these according to a number of taxonomic and functional  
239 categories, including bacterial species affiliation, sequence type, genomic MLST, resistance genes,  
240 virulence-associated genes, and plasmids. For the three patients for whom we obtained high  
241 numbers of classified reads using the read classification approach described above (C6, C7, I4)  
242 (Figure 5), we obtained information in nearly all categories using the metagenomics assembly  
243 approach (Supplementary Table S6). The taxonomic information that we obtained using the  
244 metagenomic assembly approach was in agreement in all cases with the taxonomic information we  
245 obtained using the metagenomic read classification approach. Furthermore, using metagenomics  
246 assembly analysis we detected a number of antimicrobial resistance genes in the specimens for  
247 which we also obtained taxonomic information. In addition, we detected a streptogramin B  
248 resistance gene (vat(B)) in sample C3\_UCP, an aminoglycoside resistance gene (aadD) in sample  
249 C7\_QIA, and a Col plasmid origin of replication in sample C5\_UCP. Of note, five out of the seven  
250 total samples, for which we obtained information using the metagenomics assembly approach, were  
251 ocular body fluid samples that had been processed using the UCP DNA isolation protocol  
252 (Supplementary Table S6).  
253

### 254 **Bacterial isolates from endophthalmitis patients have in most cases the same identity as** 255 **the most abundant organism determined by metagenomics**

256 At the hospital microbiology laboratory, bacteria could be isolated from the vitreous right after  
257 vitrectomy for 12 out of 14 patients. The identity of the isolates was determined by MALDI-TOF  
258 mass spectrometry (MS), and in nine cases the same agent was identified as in the metagenomic  
259 analysis (Figure 5). In addition, *Micrococcus luteus* was isolated from patient C5 in both QIA- and  
260 UCP-extracted samples (9/45), but this organism was not the most abundant one identified using the  
261 metagenomics sequencing-based method (Figure 5). Using the cultivation-based method a *Bacillus*  
262 sp. (Order: Bacillales) was determined for patient I2, and reads classified as *Paenibacillus* spp.  
263 (Order: Bacillales) were identified using the metagenomics analysis. A *Staphylococcus aureus*  
264 culture was obtained in the hospital for patient I3, and *S. aureus* was also represented with 22/18  
265 (QIA/UCP) reads in the metagenomics analysis in this patient, even though *S. epidermidis* was the  
266 most abundant organisms identified using this approach (150(QIA)/162(UCP) reads). In the two  
267 cases for which the culture-based approach was negative (C1, I7), only fewer than 25 reads were  
268 classified using the metagenomics approach.  
269

270 At the research laboratory, we attempted a recultivation of microorganisms from frozen vitreous  
271 and successfully obtained isolates for six patients. Different colony morphotypes on the agar plates  
272 were obtained and analysed using whole genome sequencing (WGS) and MALDI-TOF mass  
273 spectrometry (MS). These isolates had the same species affiliation according to WGS and MS  
274 analyses as the isolates obtained at the hospital for the same patient, and as identified in the vitreous

275 using metagenomics analysis (Figure 5). The presence of the isolates in the vitreous samples was  
276 further verified by mapping the shotgun metagenomic reads originating from the vitreous to the  
277 genomes of the isolates, and an even breath of coverage was observed for all isolates  
278 (<https://figshare.com/s/c2ce2d32daf25db54904>).  
279 Using WGS we found that for multiple morphotypes the same organism and sequence type was  
280 identified, with one exception. For patient I6, we obtained three *Staphylococcus epidermidis*  
281 isolates and of which two belonged to sequence type ST-88 and one to ST-487. The *Staphylococcus*  
282 *epidermidis* isolates obtained from other patients (C3, C7, I4) belonged to different sequence types  
283 (Figure 5, Supplementary Table S7), suggesting that they have different origins. Each  
284 *Staphylococcus epidermidis* sequence type exhibited its own set of antibiotic resistance genes,  
285 including genes facilitating resistance to macrolides,  $\beta$ -lactams, aminoglycosides, and tetracyclines.  
286 The *Enterococcus faecalis* from two patients (C2, C6) belonged to different sequence types, and  
287 both sequence types shared a gene facilitating resistance towards macrolides (Figure 5,  
288 Supplementary Table S7). Several resistance genes that were identified in the sequenced isolates  
289 were also identified in the metagenomic assembly analysis (Figure 5, Supplementary Table S6).  
290 Some of the resistance genes and their predicted functions identified using the genomics approaches  
291 were also in alignment with results from the phenotypic antibiotic susceptibility testing of the  
292 isolates obtained during the 1<sup>st</sup> culturing at the hospital  
293 (<https://figshare.com/s/e579abea97dfc8c77a6a>).  
294

#### 295 **Detection of bacteriophages and human DNA viruses**

296 As we did not identify a dominant microorganism in two endophthalmitis patients (C1, I7) we  
297 examined whether these or any of the other specimens contained DNA viruses not represented in  
298 our microbial genome database. We added an additional 7,180 virus genome sequences to the 35  
299 RefSeq virus genomes (<https://figshare.com/s/b040289827b79d3a60df>) in our database and  
300 classified our metagenomic sequencing data using kraken. We identified several *Enterococcus*,  
301 *Staphylococcus* and *Propionibacterium* bacteriophages among others in specimens that also were  
302 identified to contain the respective bacterial host (<https://figshare.com/s/ff0527509828d1529ad9>).  
303 To evaluate whether our metagenomics approach (Figure 2) would facilitate the identification of  
304 human DNA viruses, we analysed metagenomic data obtained from patients with uveitis in which  
305 human DNA viruses had been detected previously<sup>19</sup>. We obtained similar results as described by  
306 Doan and colleagues, including the identification of herpes simplex virus 1 (HSV-1) in subject 1,  
307 and rubella virus in subject 6 (Supplementary Table S8). In the previous study *Hammondia*  
308 *hammondi* was identified in subject 3 as the second most abundant organism after *Toxoplasma*  
309 *gondii*. We also detected *Toxoplasma gondii* as the most abundant organism in this specimen  
310 (represented by 4,410 reads), but did only detect 4 reads for *Hammondia hammondi*; most likely  
311 because we had removed DNA sequences from the *Hammondia hammondi* genome in the database  
312 that were flagged as ambiguous. In addition, in subject 5 we detected *Ochrobactrum anthropi*, an  
313 agent that had been identified previously in eye infections such as endophthalmitis and keratitis  
314 <sup>20,21</sup>. However, we detected *Ochrobactrum anthropi* in high abundance in the water control sample,  
315 and therefore it may here rather represent an environmental contaminant.

## 316 Discussion

317

318 Metagenomic sequencing-based analyses of complex patient specimens and whole genome  
319 sequencing (WGS) of microbial isolates will advance clinical diagnostics and treatment strategies in  
320 infectious diseases<sup>22-24</sup>. One example, for which this strategy may be advantageous is postoperative  
321 endophthalmitis as currently a causing microbial agent can only be identified in a fraction of these  
322 cases<sup>1</sup>. Immediate diagnosis and treatment of endophthalmitis is required to prevent vision loss of  
323 the affected eye, and it would be helpful to be able to distinguish between infectious and non-  
324 infectious (“sterile”) endophthalmitis. Challenges in clinical metagenomics remain at several levels,  
325 from specimen collection and processing to the generation of actionable information. We examine  
326 here vitreous samples from endophthalmitis patients together with a variety of control samples,  
327 evaluate two DNA isolation procedures, create a curated microbial reference database, and present a  
328 workflow for metagenomic sequencing data analysis. We compare the results from metagenomic  
329 read analysis to WGS and MALDI-TOF mass spectrometry identification of isolates obtained for  
330 several patients, as well as to results from metagenomic assembly analysis.

331

332 Vitreous samples were collected from 14 patients with endophthalmitis. Seven patients developed  
333 endophthalmitis post cataract surgery, in which the natural intraocular lens was exchanged with an  
334 artificial one, without the introduction of surgical instruments into the vitreous body. Another seven  
335 patients developed endophthalmitis post intravitreal injection, a procedure in which drugs were  
336 introduced into the vitreous body using surgical instruments to treat retinal diseases such as age-  
337 related macular degeneration. As controls, we included i) vitreous samples from seven  
338 endophthalmitis-negative patients, ii) balanced salt solution used during vitrectomy from both,  
339 individual bottles and the vitrectomy system after the solution had passed the vitrectomy infusion  
340 lines, and iii) DNA extraction (blank) controls (Figure 1).

341

342 We investigated two DNA isolation procedures, QIAamp DNA Mini Kit (QIA) and QIAamp UCP  
343 Pathogen Mini kit (UCP), for metagenomics analysis to determine possible infectious agents in the  
344 vitreous fluid. We obtained more reads (total and classified) on average for endophthalmitis-  
345 positive specimens when vitreous fluid was extracted with the UCP kit compared to the QIA  
346 procedure (Supplementary Figure S1 and Figure 5). In contrast, lower numbers of reads on average  
347 were obtained from the three types of control samples when they were extracted with the UCP kit  
348 compared to the QIA procedure (Supplementary Figure S1). Our analysis revealed that UCP-  
349 extracted control samples harboured a lower microbial diversity compared to QIA-extracted ones  
350 (Supplementary Figures S4 and S5). Even though we identified distinct QIA and UCP kit  
351 “fingerprints”, bacteria such as *Cutibacterium acnes* and *Propionibacterium humerusii* were present  
352 as background DNA across samples, independent of the DNA isolation kit. These bacteria likely  
353 originated from the staff handling the samples and/or additional laboratory supplies that were used  
354 during sample handling and processing<sup>25</sup>. Contaminant background DNA has been identified  
355 previously in other DNA isolation kits<sup>26-28</sup>, and our analysis suggests that an ultraclean production  
356 of reagents and consumables reduced the amount of background DNA in the UCP DNA isolation  
357 kit reagents and/or supplies. Contaminant viral DNA has been identified in previous sequencing-  
358 based studies as well such as hybrid parvovirus-like virus NIH-CQV/PHV DNA from silica  
359 column-based nucleic acid isolation kits<sup>29,30</sup>, and which we detected in our samples, too  
360 (<https://figshare.com/s/ff0527509828d1529ad9>). We did not, however, detect torque teno virus  
361 DNA, as previously described for some endophthalmitis cases<sup>31</sup>. Overall, the UCP kit appeared to



362 be suited for the isolation of DNA from vitreous, and may potentially be useful for other human  
363 body fluids and biological specimens that are assumed to have a low microbial biomass.

364  
365 Our metagenomics data analysis workflow included three filtering steps (Figure 2) to reduce i)  
366 human host DNA sequences, ii) false positive hits due to ambiguous and contaminant DNA  
367 sequences in reference genomes, and iii) environmental background DNA sequences introduced by  
368 kit reagents, potentially other laboratory supplies, as well as laboratory staff. We particularly found  
369 that ambiguous/contaminant sequences in public genomes, which serve as reference in many  
370 metagenomic studies, could lead to the false positive identification of microorganisms. Our initial  
371 read classification, in which we used the original reference genomes, revealed *Toxoplasma gondii*  
372 (false positive) across samples, even after filtering reads that mapped to the human reference  
373 genome. Some microbial reference genomes appeared to harbour human DNA sequences not  
374 present in the human reference genome, thus making it challenging to detect these sequences in the  
375 initial human DNA sequence filtering step. This effect is especially critical when analysing clinical  
376 specimens, since the patient's DNA is expected to be found in these samples. In addition, we  
377 noticed that certain microbial genomes contained sequences that had a high similarity to other  
378 microorganisms belonging to a different genus. These can be correct naturally occurring DNA  
379 sequence regions that have a high similarity across a range of microbial taxa (including regions  
380 acquired via horizontal gene transfer). In other cases they can be contaminant contigs or scaffolds in  
381 primarily incomplete genome sequence assemblies. In either case, the read classification can lead to  
382 a false positive identification of microorganisms. Contaminant DNA sequences in published  
383 genomes have been previously found, particularly in human and animal genome assemblies<sup>32-34</sup>.  
384 Hence, we systematically examined 5,715 microbial reference and representative genomes (archaea,  
385 bacteria, fungi, protozoa), and in 62% of all incomplete microbial genomes sequences were flagged  
386 as ambiguous. We removed 70,478 ambiguous sequences (including human and microbial  
387 contaminants), reflecting 0.35% of the bases in total from the microbial reference genomes  
388 (<https://figshare.com/s/045b1252bd7555b50ef0>). The majority of the removed sequence fragments  
389 are a correct part of the respective genome. However, a more complex and thorough analysis is  
390 required in the future to decide whether a particular part should be removed or not. In our case,  
391 many of the removed sequences are plasmids or sequence fragments from lower-quality assemblies.  
392 Since plasmids are mobile genetic elements it is unknown at what confidence-level they contribute  
393 to the taxonomy assignment because some plasmids have a broad host range. The removed  
394 sequences from the lower-quality assemblies should be neglectable in our clinical study, since most  
395 of the identified infectious agents are not in that category. According to the insight gained from this  
396 study we recommend using curated microbial reference genomes in microbiome studies and  
397 particularly for the analysis of clinical samples with an assumed low microbial biomass.  
398 Additionally, subsequent to filtering we recommend to always check the sequences that were  
399 removed. We provide a script that facilitates the generation of curated databases, including the one  
400 used in this study (<https://github.com/philDTU/endoPublication>) as well as the sequences of the  
401 curated genomes (<ftp://ftp.cbs.dtu.dk/public//CGE/databases/CuratedGenomes>).

402  
403 Our analysis further demonstrated the benefit of including a variety of control samples. In fact, the  
404 number of control samples in this study exceeded the number of the main samples under  
405 investigation by a factor of 1.2. By analysing vitreous from endophthalmitis-negative patients,  
406 aliquots of balanced salt solution (from bottle and vitrectomy infusion line), and blank DNA  
407 extraction controls, we determined the background levels of organisms in the respective  
408 environments. All control sample types had a similar microbiome pattern, characterized by  
409 organisms found in the corresponding DNA extraction (blank) controls (QIA and UCP) and typical

410 skin inhabitants. We did not identify specific microorganisms for the endophthalmitis-negative  
411 patients, similar to previous cultivation-based assessments, suggesting that vitreous fluid is a sterile  
412 body part or only contains few microbial cells in individuals without eye infections<sup>35,36</sup>. We also  
413 did not identify any specific organisms residing in balanced salt solution that was infused into the  
414 patient's eye, in addition to the ones identified in DNA extraction controls. In all cases, we cannot  
415 however exclude that DNA sequences from other microorganisms would have been found if a  
416 deeper DNA sequencing had been performed or RNA had been isolated and analysed by deep  
417 sequencing. In our analysis of the vitreous fluid from endophthalmitis-positive patients we removed  
418 the background contaminant organisms *in silico* that were detected in the respective DNA  
419 extraction controls and were not present in higher abundance in the endophthalmitis-positive  
420 patients. To trace the origin of detected organisms, including infectious agents, additional controls  
421 in future studies could include samples from: i) the patients skin, eye lid, conjunctiva, or other body  
422 sites that are in proximity to the surgical site, ii) the surgical instruments, iii) blank tubes and/or  
423 devices used for the collection of the patient specimen, as well as iv) reference mock communities  
424 with known composition. Careful analysis of control samples may assist in the design of  
425 harmonized standards and guidelines for the sequencing-based analysis of clinical samples and  
426 other biological specimens.

427  
428 Through our metagenomics read classification data analysis workflow we identified a single  
429 potential causing microorganism in 11 out of 12 culture-positive cases, and which in most cases  
430 agreed with the cultivation-based analyses (Figure 5). For patient C5 we did not identify a single  
431 potential causing agent and instead obtained different microbiome patterns for the two sequenced  
432 aliquots (QIA and UCP). In both samples we detected *Micrococcus luteus*, in alignment with the  
433 cultivation-based analysis. However, *Micrococcus luteus* was not the most abundant organism in  
434 the metagenomic analysis. *Escherichia coli* was the most abundant organism in the UCP-extracted  
435 sample, but which may also be a contamination introduced during sample handling. For patient I2  
436 we revealed *Paenibacillus* spp. as a possible causing agent, whereas in the cultivation-dependent  
437 analysis the isolate was identified as a related *Bacillus* sp using MALDI-TOF. For patient I3, our  
438 metagenomic analysis suggests a potential infection by *Staphylococcus epidermidis* together with  
439 *Staphylococcus aureus*. In the cultivation-based analysis *Staphylococcus aureus* was identified as  
440 the potential causing agent. Only a few metagenomic reads were classified for patients C1 and I7,  
441 and which were regarded as contaminants. For these two patients no microorganisms could be  
442 isolated by cultivation-based methods, neither at the hospital nor the research laboratory. Therefore,  
443 these two patients are assumed to have a non-infectious (sterile) endophthalmitis.

444  
445 Both, the analysis of metagenome assemblies as well as whole genome sequences of isolates can  
446 reveal the presence of antibiotic resistance genes that could potentially guide therapeutic treatment  
447 strategies, in particular when verified by results from susceptibility analysis of isolates. In addition,  
448 the specific sequence type for infectious agents, such as *Enterococcus faecalis*, *Staphylococcus*  
449 *epidermidis*, and other organisms, can be identified and assist in the source tracking and  
450 epidemiology of the particular agent. Detailed evolutionary relationships between isolates can be  
451 revealed if sufficient genome sequence information has been obtained. Our analysis of the  
452 identified *Enterococcus faecalis* and *Staphylococcus epidermidis* suggests that they may originate  
453 from the individuals involved in the surgery or the immediate environment, as different bacterial  
454 sequence types and resistant profiles were identified across patients. The metagenomics analysis did  
455 not reveal these bacteria to be present in the balanced salt solution samples, further pointing  
456 towards an acquisition from another source.

457

458 Our previous clinical microbiology research on urinary tract infections and diarrhoeal diseases<sup>37,38</sup>  
459 had some limitations for assessing clinical metagenomics as a technology, and whose analysis could  
460 now be improved by new insight gained from this study. For example, the examined urine samples  
461 were pre-processed by using a centrifugation step to remove human cells<sup>37</sup>. In this step, also  
462 microbial cells may have been removed that have a similar density than the human cells and/or  
463 were attached to these. While this step can be advantageous to limit human contaminant sequences,  
464 it could be of interest to examine samples with and without the sedimentation step and using the  
465 DNA isolation procedure and/or data analysis pipeline described in the present study. Furthermore,  
466 the presence of potential contaminant DNA sequences was not examined in the previous study. In  
467 the study concerning diarrhoeal diseases one challenge was to differentiate between natural  
468 intestinal inhabitants, possible infectious agents, and potential contaminants<sup>38</sup>. Careful  
469 bioinformatics filtering steps and inclusion of control samples, as used in the present study, might  
470 allow for more robust identifications in the future. To facilitate a more standardized workflow for  
471 sample analysis, we have created a list of recommendations for the design and execution of  
472 metagenomic sequencing projects (<https://figshare.com/s/2a0709b1f0c5e18754df>), in addition to  
473 specific details described in this study.  
474

475 In summary, we find that metagenomics analysis, supported by WGS of isolates, may be a  
476 promising strategy for the identification and characterization of infectious agents from human  
477 ocular body fluid. This technology may also facilitate a more robust differentiation between  
478 infectious and non-infectious (“sterile”) endophthalmitis. Nucleic acid extraction from patient  
479 specimens, followed by high-throughput sequencing may ultimately provide more rapid insight in  
480 regard to the identity of the causing agent(s) than cultivation-based techniques, in particular in light  
481 of recent developments in long-read nanopore sequencing and real-time analysis<sup>39-41</sup>. In cases  
482 where the metagenomic sequencing depth of coverage of the microorganism is sufficiently high,  
483 valuable functional information such as antibiotic resistance and virulence-associated genes can be  
484 revealed. Prerequisites for a robust data analysis are suitable procedures that facilitate the isolation  
485 of nucleic acid from microorganisms residing in complex samples, the analysis of relevant control  
486 samples, as well as high-quality genome sequence reference databases for data analysis, as  
487 exemplified in this study.  
488  
489

## 490 **Methods**

### 491 **Vitreous Samples**

492 A total of 21 vitreous samples from 21 individual patients were examined in this study. From April  
493 2012 to November 2013, vitreous samples from 14 eyes with postoperative endophthalmitis  
494 following cataract surgery (n=7) and intravitreal injection (n=7) were collected using vitrectomy  
495 after informed consent had been obtained. At the Department of Ophthalmology, Glostrup  
496 Rigshospitalet (Denmark), where vitreous was collected, all patients with suspected postoperative  
497 endophthalmitis are treated with a vitrectomy independent of the presenting visual acuity. As  
498 control, vitreous was collected from 7 patients without endophthalmitis during macula hole surgery  
499 after informed consent had been obtained. Approximately 1-2 ml of vitreous body fluid was  
500 aspirated from each eye. It was at the discretion of the vitreoretinal surgeon whether to aspirate the  
501 vitreous sample before or after balanced salt solution installation. About half of each collected  
502 sample was cultured in the acute clinical setting at the Department of Microbiology, Hvidovre  
503 Hospital, Denmark, and the remaining material was stored at -80°C.

### 505 **Balanced salt solution samples**

506 During vitrectomy, balanced salt solution (BSS PLUS, Alcon) is infused into the eye in order to  
507 keep the appropriate tension of the eye. BSS PLUS is a sterile physiological saltwater solution  
508 containing bicarbonate, dextrose and glutathione. Subsequently, 2.25 mg ceftazidime and 1 mg  
509 vancomycin dissolved in 0.1 ml sterile salt solution are injected into the vitreous chamber. We  
510 examined 3 paired sets of samples, i.e. 6 BSS samples in total. Aliquots were taken directly from  
511 separate BSS PLUS bottles before vitrectomy at different time points during the study period.  
512 Subsequently, BSS was collected from the vitrectomy surgical system after the BSS bottle had been  
513 connected and BSS had passed through the vitrectomy infusion line. The aliquot obtained from the  
514 vitrectomy system represents the fluid that is infused into the eye of the patient. The BSS samples  
515 were stored at -80°C.

### 517 **Isolation of DNA from complex samples**

518 DNA was isolated from 200 µl vitreous fluid and balanced salt solution samples using two different  
519 DNA isolation procedures, i) the QIAamp DNA Mini Kit (51304, Qiagen), and ii) the QIAamp  
520 UCP Pathogen Mini Kit (50214, Qiagen). For each round of DNA isolation, one extraction control  
521 (blank) was included. For details, see Supplementary Methods.

### 523 **Metagenomic sequencing**

524 The DNA was prepared and sequenced according to the Nextera XT DNA Library Preparation  
525 Guide, Part # 15031942 Rev. D. Sequencing was performed on an Illumina MiSeq sequencer using  
526 paired-end sequencing with v3 chemistry and 2×250 cycles. A total of 90,599,659 read pairs were  
527 obtained from the samples. The number of read pairs was in a range of 711,886 – 4,633,576 for the  
528 samples from patients with endophthalmitis, with the exception of sample I6\_QIA for which only  
529 106 read-pairs were obtained (Supplementary Table S2).

### 531 **Metagenomic sequencing data analysis**

532 The metagenomics analysis was carried out in five steps. 1) Adapter and quality trimming as well as  
533 low complexity filtering of raw reads was performed using BBDuk of BBMap version 35.82  
534 (<http://jgi.doe.gov/data-and-tools/bbtools/>). 2) Removal of human-affiliated reads from samples in a  
535 2-step approach: i) reads that mapped against the reference genome GRCh38.p10  
536 (GCF\_000001405.36), and ii) reads that aligned to human sequences in the non-redundant  
537 nucleotide collection (nt) database from NCBI. 3) Detection of ambiguous sequences in public

538 reference genomes and creation of curated microbial genome database that was composed of 5751  
539 different genomes: archaea (251), bacteria (5166), fungi (225), protozoa (73), viruses (35) and the  
540 human reference GRCh38.p7 (Supplementary Table S4). 4) Classification of reads in samples using  
541 Kraken followed by Bayesian reestimation of abundance (Bracken)<sup>42,43</sup>, and 5) Classification of  
542 reads using BLASTn of BLAST version 2.6.0<sup>44</sup>. For details, see Supplementary Methods.

#### 543 544 **Cultivation and mass spectrometry (Clinical Microbiology lab)**

545 Aliquots from the vitreous specimens were cultivated for 12 days on 5% horse blood agar,  
546 chocolate agar, brain heart infusion broth under anaerobic conditions, and on anaerobic plates (SSI  
547 Diagnostica, Denmark) under anaerobic conditions at 35°C according to the standard operating  
548 procedure at the Department of Clinical Microbiology, Hvidovre Hospital. Species identification  
549 was performed using MALDI-TOF mass spectrometry analysis (MALDI Biotyper 3.1, Bruker  
550 Daltonics Microflex LT, database MBT DB-5627) from colony material. Antimicrobial  
551 susceptibility was tested towards a range of compounds and the results were interpreted in  
552 accordance to EUCAST breakpoints ([http://www.eucast.org/clinical\\_breakpoints/](http://www.eucast.org/clinical_breakpoints/)).

#### 553 554 **Cultivation (Research lab)**

555 To isolate bacteria and fungi from the vitreous body and balanced salt solution samples, 100 µl  
556 aliquots were distributed on chocolate agar (SSI Diagnostica, Denmark) and Sabouraud agar with  
557 Chloramphenicol (Fischer Scientific). The chocolate agar was incubated for 2 days at 37°C.  
558 Colonies from the chocolate agar plates were harvested and stored in Protect Multipurpose TS80  
559 preservation tubes (Technical Service Consultants Ltd, UK) at -80°C. One representative colony  
560 morphotype per sample was selected for whole genome sequencing. No growth after incubation for  
561 5 days was observed on the Sabouraud agar plates.

#### 562 563 **Whole genome sequence analysis**

564 Isolates were sequenced (2x150 bp paired-end) on a MiSeq system (Illumina, San Diego, CA, USA)  
565 as previously described<sup>45</sup>. Reads were adapter trimmed and filtered for phiX reads using BBduk.  
566 The high-quality reads were assembled using the SPAdes assembler<sup>46</sup>, and the genome sequence  
567 assemblies analysed using the Bacterial Analysis Pipeline<sup>47</sup>. For details, see Supplementary  
568 Methods.

#### 569 570 **Ethics**

571 This study was performed in accordance with the Declaration of Helsinki. It was approved by the  
572 Danish Data Protection Agency (journal number: 2011-41-5881) and by the local ethics committee  
573 De Videnskabsetiske Komiteer - Region Hovedstaden (journal number: H-2-2011-004), and took  
574 place at public clinics in the capital region of Denmark.

#### 575 576 **Data accessibility**

577 The sequencing data generated and analyzed in this study are available from DDBJ/ENA/GenBank  
578 under the umbrella project PRJEB21503, including metagenomics shotgun reads (ERS1830261-  
579 ERS1830322), WGS reads (ERS1827480-ERS1827489), and WGS assemblies (ERZ468526-  
580 ERZ468535). A detailed methods description and results from the data analysis are available as  
581 supplemental material from the journal website and through Figshare  
582 ([https://figshare.com/projects/Genomics-  
583 Based\\_Identification\\_of\\_Microorganisms\\_in\\_Human\\_Ocular\\_Body\\_Fluid/21038](https://figshare.com/projects/Genomics-Based_Identification_of_Microorganisms_in_Human_Ocular_Body_Fluid/21038)). The code for the  
584 creation of the curated microbial reference genome database is accessible from Github

585 (<https://github.com/philDTU/endoPublication>), and the curated microbial reference genomes can be  
586 downloaded from <ftp://ftp.cbs.dtu.dk/public//CGE/databases/CuratedGenomes>.  
587

## 588 References

589

- 590 1. Durand, M. L. Bacterial and Fungal Endophthalmitis. *Clinical Microbiology Reviews* **30**, 597–  
591 613 (2017).
- 592 2. Bannerman, T. L., Rhoden, D. L., McAllister, S. K., Miller, J. M. & Wilson, L. A. The source of  
593 coagulase-negative staphylococci in the Endophthalmitis Vitrectomy Study. A comparison of  
594 eyelid and intraocular isolates using pulsed-field gel electrophoresis. *Arch Ophthalmol* **115**,  
595 357–361 (1997).
- 596 3. Buchta, V. *et al.* Outbreak of Fungal Endophthalmitis Due to *Fusarium oxysporum* Following  
597 Cataract Surgery. *Mycopathologia* **177**, 115–121 (2014).
- 598 4. Foster, A. Cataract and ‘Vision 2020—the right to sight’ initiative. *British Journal of*  
599 *Ophthalmology* **85**, 635–639 (2001).
- 600 5. Solborg Bjerrum, S., Kiilgaard, J. F., Mikkelsen, K. L. & la Cour, M. Outsourced cataract  
601 surgery and postoperative endophthalmitis. *Acta Ophthalmol* **91**, 701–708 (2013).
- 602 6. Shorstein, N. H., Winthrop, K. L. & Herrinton, L. J. Decreased postoperative endophthalmitis  
603 rate after institution of intracameral antibiotics in a Northern California eye department.  
604 *Journal of Cataract & Refractive Surgery* **39**, 8–14 (2013).
- 605 7. Gower, E. W. *et al.* Characteristics of Endophthalmitis after Cataract Surgery in the United  
606 States Medicare Population. *Ophthalmology* **122**, 1625–1632 (2015).
- 607 8. Avery, R. L. *et al.* Intravitreal injection technique and monitoring: updated guidelines of an  
608 expert panel. *Retina* **34 Suppl 12**, S1–S18 (2014).
- 609 9. McCannel, C. A. Meta-analysis of endophthalmitis after intravitreal injection of anti-vascular  
610 endothelial growth factor agents: causative organisms and possible prevention strategies.  
611 *Retina* **31**, 654–661 (2011).
- 612 10. Endophthalmitis Vitrectomy Study Group. Results of the Endophthalmitis Vitrectomy Study. A  
613 randomized trial of immediate vitrectomy and of intravenous antibiotics for the treatment  
614 of postoperative bacterial endophthalmitis. Endophthalmitis Vitrectomy Study Group. *Arch*  
615 *Ophthalmol* **113**, 1479–1496 (1995).
- 616 11. Yao, K. *et al.* The incidence of postoperative endophthalmitis after cataract surgery in China:  
617 a multicenter investigation of 2006–2011. *British Journal of Ophthalmology* **97**, 1312–1317  
618 (2013).
- 619 12. Seal, D. *et al.* Laboratory diagnosis of endophthalmitis: Comparison of microbiology and  
620 molecular methods in the European Society of Cataract & Refractive Surgeons multicenter  
621 study and susceptibility testing. *Journal of Cataract & Refractive Surgery* **34**, 1439–1450  
622 (2008).
- 623 13. Barry, P., Cordovés, L. & Gardner, S. *ESCRS guidelines for prevention and treatment of*  
624 *endophthalmitis following cataract surgery: data, dilemmas and conclusions.* (ESCRS, 2013).
- 625 14. Wilson, M. R. *et al.* Actionable Diagnosis of Neuroleptospirosis by Next-Generation  
626 Sequencing. *New England Journal of Medicine* **370**, 2408–2417 (2014).
- 627 15. Oh, J. *et al.* Temporal Stability of the Human Skin Microbiome. *Cell* **165**, 854–866 (2016).
- 628 16. Zankari, E. *et al.* Identification of acquired antimicrobial resistance genes. *Journal of*  
629 *Antimicrobial Chemotherapy* **67**, 2640–2644 (2012).
- 630 17. Joensen, K. G. *et al.* Real-Time Whole-Genome Sequencing for Routine Typing, Surveillance,  
631 and Outbreak Detection of Verotoxigenic *Escherichia coli*. *Journal of Clinical Microbiology*  
632 **52**, 1501–1510 (2014).

- 633 18. Breitwieser, F. P. & Salzberg, S. L. *Pavian: Interactive analysis of metagenomics data for*  
634 *microbiomics and pathogen identification*. (bioRxiv, 2016). doi:10.1101/084715
- 635 19. Doan, T. *et al.* Illuminating uveitis: metagenomic deep sequencing identifies common and  
636 rare pathogens. *Genome Medicine* 1–9 (2016). doi:10.1186/s13073-016-0344-6
- 637 20. Mattos, F. B., Saraiva, F. P., Angotti-Neto, H. & Passos, A. F. Outbreak of *Ochrobactrum*  
638 *anthropi* endophthalmitis following cataract surgery. *Journal of Hospital Infection* **83**, 337–  
639 340 (2013).
- 640 21. Venkateswaran, N., Wozniak, R. A. F. & Hindman, H. B. *Ochrobactrum anthropi* Keratitis  
641 with Focal Descemet's Membrane Detachment and Intracorneal Hypopyon. *Case Reports in*  
642 *Ophthalmological Medicine* **2016**, 1–4 (2016).
- 643 22. Relman, D. A. Actionable Sequence Data on Infectious Diseases in the Clinical Workplace.  
644 *Clinical Chemistry* **61**, 38–40 (2014).
- 645 23. Pallen, M. J. Diagnostic metagenomics: potential applications to bacterial, viral and parasitic  
646 infections. *Parasitology* **141**, 1856–1862 (2014).
- 647 24. Didelot, X., Bowden, R., Wilson, D. J., Peto, T. E. A. & Crook, D. W. Transforming clinical  
648 microbiology with bacterial genome sequencing. *Nature Reviews Genetics* **13**, 601–612  
649 (2012).
- 650 25. Mollerup, S. *et al.* Propionibacterium acnes: Disease-Causing Agent or Common  
651 Contaminant? Detection in Diverse Patient Samples by Next-Generation Sequencing.  
652 *Journal of Clinical Microbiology* **54**, 980–987 (2016).
- 653 26. Salter, S. J. *et al.* Reagent and laboratory contamination can critically impact sequence-  
654 based microbiome analyses. *BMC Biology* 1–12 (2014). doi:10.1186/s12915-014-0087-z
- 655 27. Glassing, A., Dowd, S. E., Galandiuk, S., Davis, B. & Chiodini, R. J. Inherent bacterial DNA  
656 contamination of extraction and sequencing reagents may affect interpretation of  
657 microbiota in low bacterial biomass samples. *Gut Pathogens* 1–12 (2016).  
658 doi:10.1186/s13099-016-0103-7
- 659 28. Tanner, M. A., Goebel, B. M., Dojka, M. A. & Pace, N. R. Specific ribosomal DNA sequences  
660 from diverse environmental settings correlate with experimental contaminants. *Applied and*  
661 *Environmental Microbiology* **64**, 3110–3113 (1998).
- 662 29. Naccache, S. N. *et al.* The Perils of Pathogen Discovery: Origin of a Novel Parvovirus-Like  
663 Hybrid Genome Traced to Nucleic Acid Extraction Spin Columns. *Journal of Virology* **87**,  
664 11966–11977 (2013).
- 665 30. Smuts, H., Kew, M., Khan, A. & Korsman, S. Novel hybrid parvovirus-like virus, NIH-  
666 CQV/PHV, contaminants in silica column-based nucleic acid extraction kits. *Journal of*  
667 *Virology* **110**, 10264–10269 (2014).
- 668 31. Lee, A. Y., Akileswaran, L., Tibbetts, M. D., Garg, S. J. & Van Gelder, R. N. Identification of  
669 Torque Teno Virus in Culture-Negative Endophthalmitis by Representational Deep DNA  
670 Sequencing. *Ophthalmology* **122**, 524–530 (2015).
- 671 32. Merchant, S., Wood, D. E. & Salzberg, S. L. Unexpected cross-species contamination in  
672 genome sequencing projects. *PeerJ* **2**, e675 (2014).
- 673 33. Kryukov, K. & Imanishi, T. Human Contamination in Public Genome Assemblies. *PLoS ONE*  
674 **11**, e0162424 (2016).
- 675 34. Longo, M. S., O'Neill, M. J. & O'Neill, R. J. Abundant Human DNA Contamination Identified in  
676 Non-Primate Genome Databases. *PLoS ONE* **6**, e16410 (2011).
- 677 35. Harper, D. R. A comparative study of the microbiological contamination of postmortem



- 678 blood and vitreous humour samples taken for ethanol determination. *Forensic Sci Int* **43**,  
679 37–44 (1989).
- 680 36. Egger, S. F. *et al.* Bacterial growth in human vitreous humor. *Exp Eye Res* **65**, 791–795  
681 (1997).
- 682 37. Hasman, H. *et al.* Rapid Whole-Genome Sequencing for Detection and Characterization of  
683 Microorganisms Directly from Clinical Samples. *Journal of Clinical Microbiology* **52**, 139–146  
684 (2014).
- 685 38. Joensen, K. G. *et al.* Evaluating next-generation sequencing for direct clinical diagnostics in  
686 diarrhoeal disease. *European Journal of Clinical Microbiology & Infectious Diseases* **36**,  
687 1325–1338 (2017).
- 688 39. Greninger, A. L. *et al.* Rapid metagenomic identification of viral pathogens in clinical  
689 samples by real-time nanopore sequencing analysis. *Genome Medicine* 1–13 (2015).  
690 doi:10.1186/s13073-015-0220-9
- 691 40. Cao, M. D. *et al.* Streaming algorithms for identification of pathogens and antibiotic  
692 resistance potential from real-time MinION™ sequencing. *GigaScience* **5**, 32 (2016).
- 693 41. Quick, J. *et al.* Multiplex PCR method for MinION and Illumina sequencing of Zika and other  
694 virus genomes directly from clinical samples. *Nat Protoc* **12**, 1261–1276 (2017).
- 695 42. Wood, D. E. & Salzberg, S. L. Kraken: ultrafast metagenomic sequence classification using  
696 exact alignments. *Genome Biology* **15**, 1–12 (2014).
- 697 43. Lu, J., Breitwieser, F. P., Thielen, P. & Salzberg, S. L. Bracken: estimating species abundance  
698 in metagenomics data. *PeerJ Computer Science* **3**, e104 (2017).
- 699 44. Altschul, S. F., Gish, W., Miller, W., Myers, E. W. & Lipman, D. J. Basic local alignment search  
700 tool. *J Mol Biol* **215**, 403–410 (1990).
- 701 45. Bartels, M. D. *et al.* Comparing Whole-Genome Sequencing with Sanger Sequencing for spa  
702 Typing of Methicillin-Resistant *Staphylococcus aureus*. *Journal of Clinical Microbiology* **52**,  
703 4305–4308 (2014).
- 704 46. Bankevich, A. *et al.* SPAdes: A New Genome Assembly Algorithm and Its Applications to  
705 Single-Cell Sequencing. *Journal of Computational Biology* **19**, 455–477 (2012).
- 706 47. Thomsen, M. C. F. *et al.* A Bacterial Analysis Platform: An Integrated System for Analysing  
707 Bacterial Whole Genome Sequencing Data for Clinical Diagnostics and Surveillance. *PLoS*  
708 *ONE* **11**, e0157718 (2016).  
709

## 710 **Acknowledgements**

711 We thank Jacob Dyring Jensen (Technical University of Denmark) for technical assistance related  
712 to DNA sequencing. We are grateful for the support by Hanne Mordhorst (Technical University of  
713 Denmark) in the PCR-based analysis of vitreous samples, Ole Lund (Technical University of  
714 Denmark) for support with the ftp server, and Kees Veldman (Wageningen University) for  
715 providing a *S. epidermidis* reference strain. Thuy Doan (University of California San Francisco) is  
716 acknowledged for providing clarifying information regarding publication PMID: 27562436. This  
717 work was in parts supported by the European Union's Framework Programme for Research and  
718 Innovation, Horizon2020 (643476). The funders had no role in study design, data collection and  
719 interpretation, or the decision to submit the work for publication.

720

## 721 **Author contributions statement**

722 P.K., S.S.B., H.W., and S.J.P. designed the research; P.K., S.S.B., A.F.M, H.W. and S.J.P.  
723 performed the research; P.K., F.M.A., H.W., and S.J.P. contributed analytic tools; P.K., S.S.B.,  
724 A.F.M., H.W., and S.J.P. analysed the data; P.K. and S.J.P. wrote the manuscript; and S.S.B,  
725 A.F.M, F.M.A., and H.W. edited the manuscript. All authors have read and approved the  
726 manuscript as submitted.

727

## 728 **Additional information**

### 729 **Competing financial interests**

730 The authors declare that they have no competing interests.

731 **Figures**  
 732  
 733

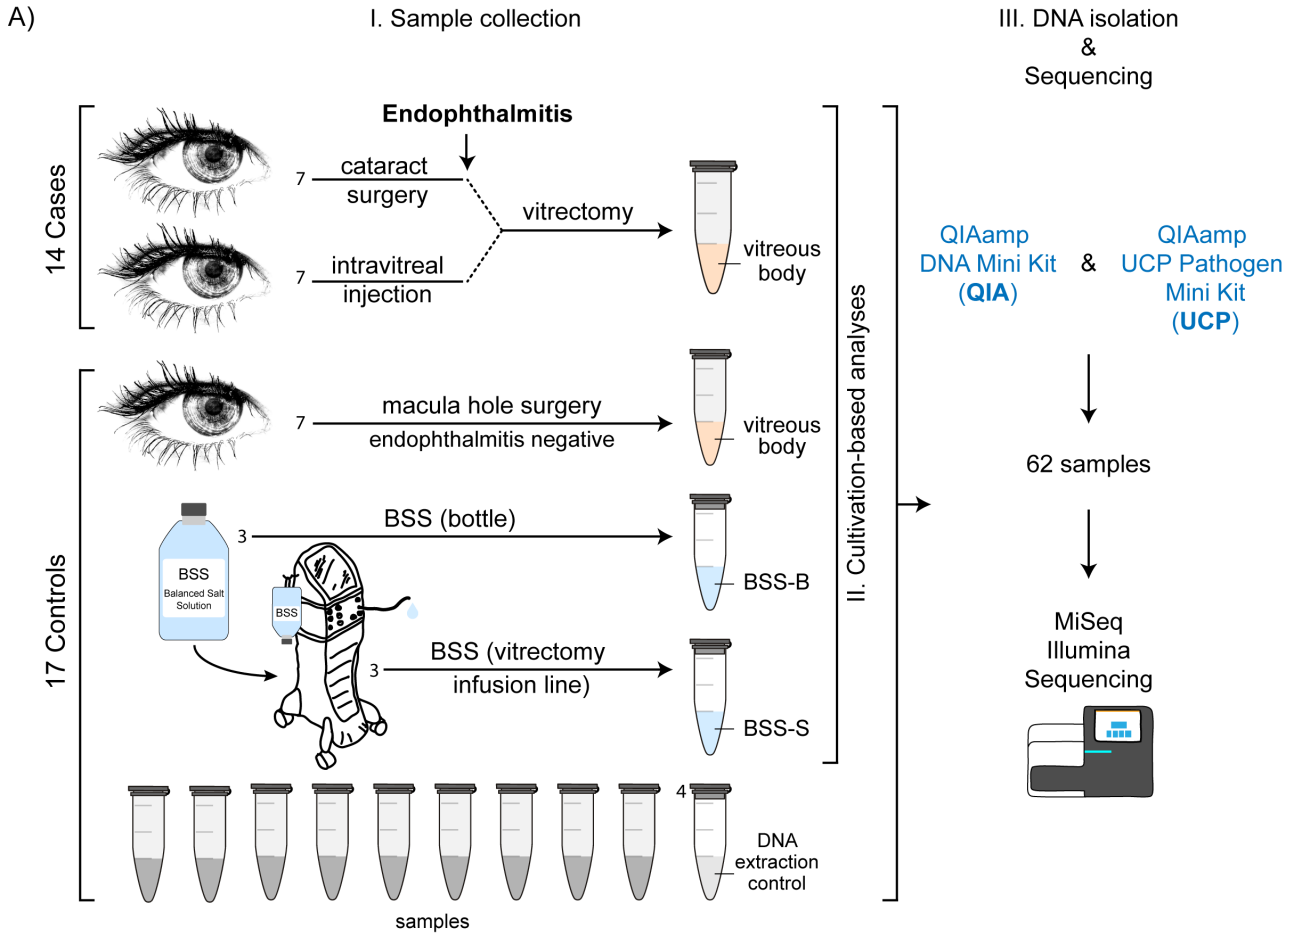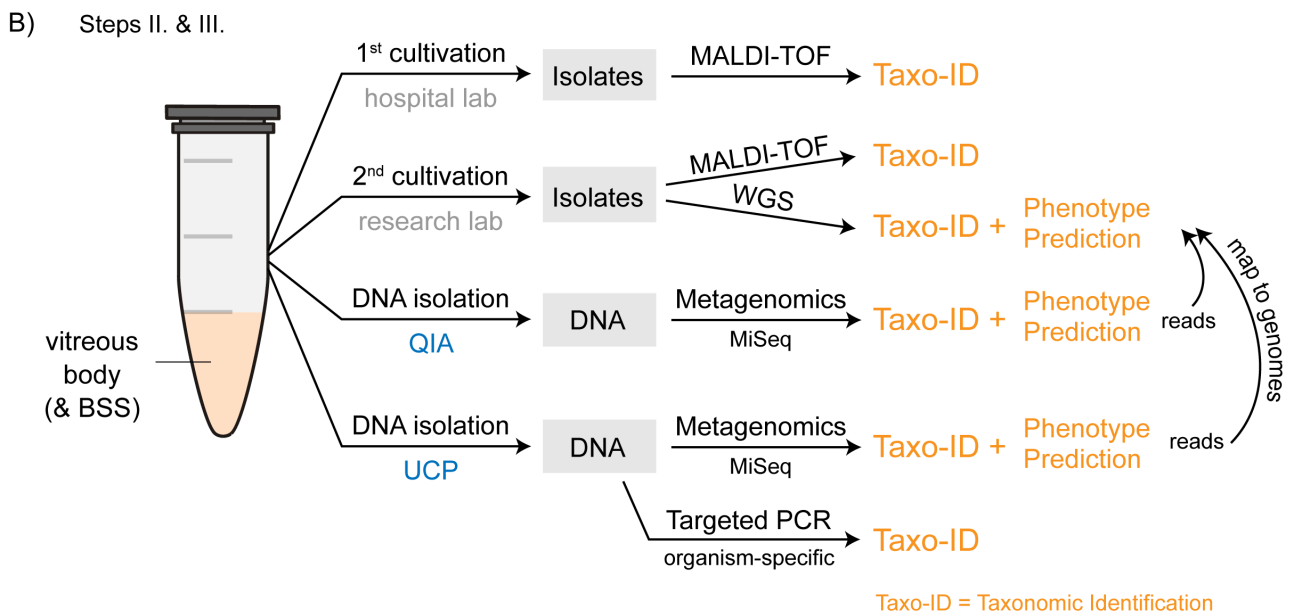

734

735

736

737

**Figure 1: Sample collection, DNA isolation, and shotgun metagenomic sequencing.**

738

739

740

741

742

743

744

745

746

747

748

749

750

751

752

753

754

755

756

757

758

759

760

761

762

763

A) I.) Sample collection: Vitreous body (intraocular body fluid) was collected through vitrectomy from 14 patients with endophthalmitis following cataract surgery (n=7) and intravitreal injection (n=7). As control, vitreous was collected from 7 patients without postoperative endophthalmitis during macula hole surgery. Six aliquots (3 sample pairs) were obtained from balanced salt solution (BSS) that is infused into the eye during vitrectomy. Three aliquots were collected from separate BSS bottles (BSS-B), and the second set of aliquots was collected from the vitrectomy surgical system (BSS-S) after it had passed through the vitrectomy infusion line, respectively. The samples were examined using II.) Cultivation-based analyses and III.) DNA isolation (2 methods) & Metagenomic shotgun sequencing, including the examination of DNA extraction (blank) controls. A total of 62 samples were sequenced using Illumina MiSeq sequencing technology. B) More details to steps II.) and III.): II.) Cultivation-based analyses: Aliquots of the vitreous body fluid and balanced salt solution samples were subjected to cultivation-based analyses separately at the hospital and research laboratories. Obtained isolates were analyzed using mass spectrometry and whole genome sequencing. III.) DNA isolation & Metagenomic shotgun sequencing: Samples were extracted using two DNA isolation procedures: QIAamp DNA Mini Kit (QIA), and QIAamp UCP Pathogen Mini kit (UCP). A DNA extraction (blank) control was included at each round of DNA isolation, i.e. one DNA extraction control for 12-14 samples in total per extraction round (more vitreous samples were extracted than analyzed in this study). To verify the presence of the main microorganisms detected in the metagenomics analysis, the shotgun metagenomics reads were mapped to the genome assemblies of the isolates obtained from the vitreous samples. Not displayed here is the mapping of metagenomic shotgun reads to microbial reference genomes in the database (Provided in Figure 4). As an additional verification, PCR analyses were carried out to detect the presence of the most abundant microorganisms in the vitreous samples using organism-specific primer sets.

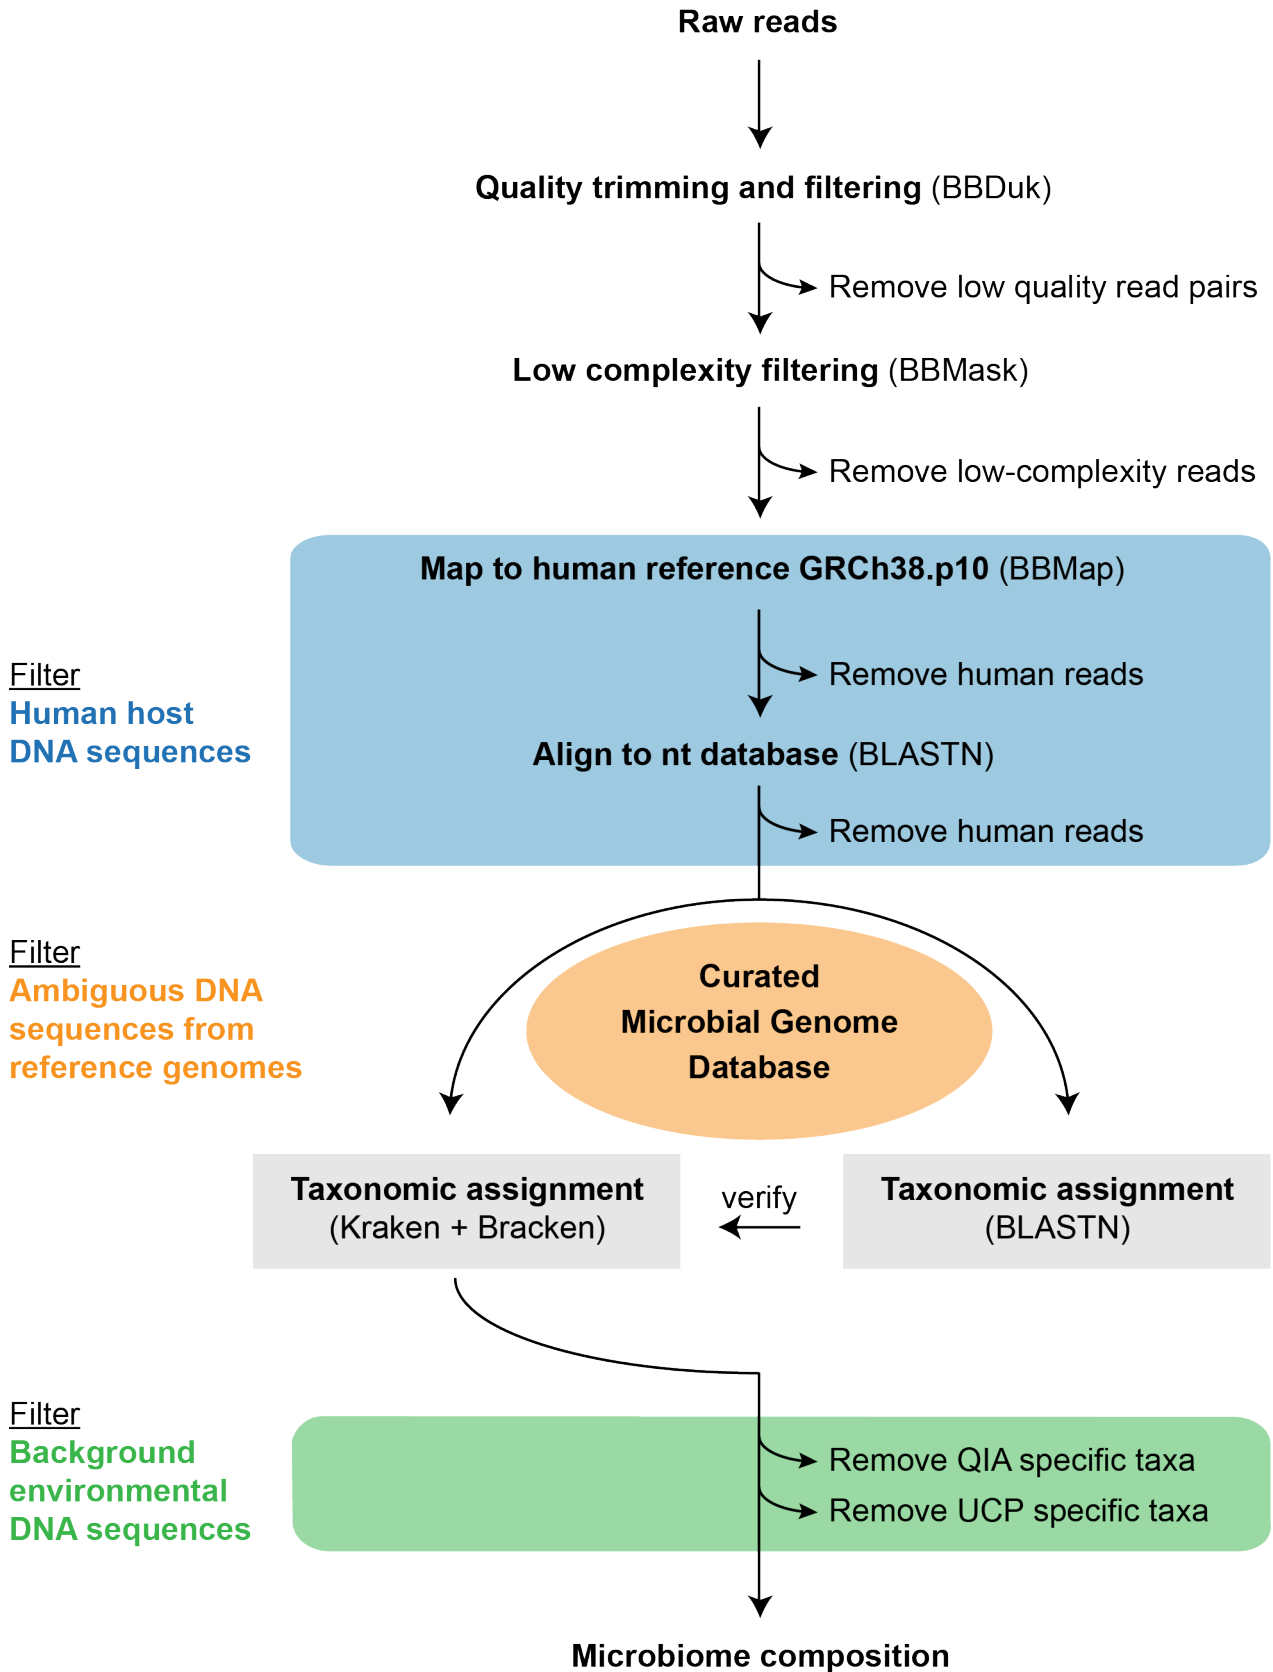

764  
765

766 **Figure 2: Workflow for metagenomic data analysis.** In a first step, sequencing  
767 adapters, low quality bases, and reads with low complexity were removed. Subsequently,  
768 reads that mapped against the human reference genome sequence, or aligned with  
769 human sequences in the nt database were removed. The taxonomic classification of the  
770 reads was performed with Kraken together with Bracken using a curated microbial  
771 genome database containing 5750 microbial (archaea [251], bacteria [5166], fungi [225],  
772 protozoa [73], viruses [35]) and 1 human reference genome sequence (for details, see  
773 Supplementary Methods). Additional reads that in this step were classified as human  
774 were removed. To verify the classification results, the reads were also aligned to the  
775 reference genomes using BLASTn. Organisms specific for the DNA extraction (blank)  
776 controls were filtered from the patient samples.

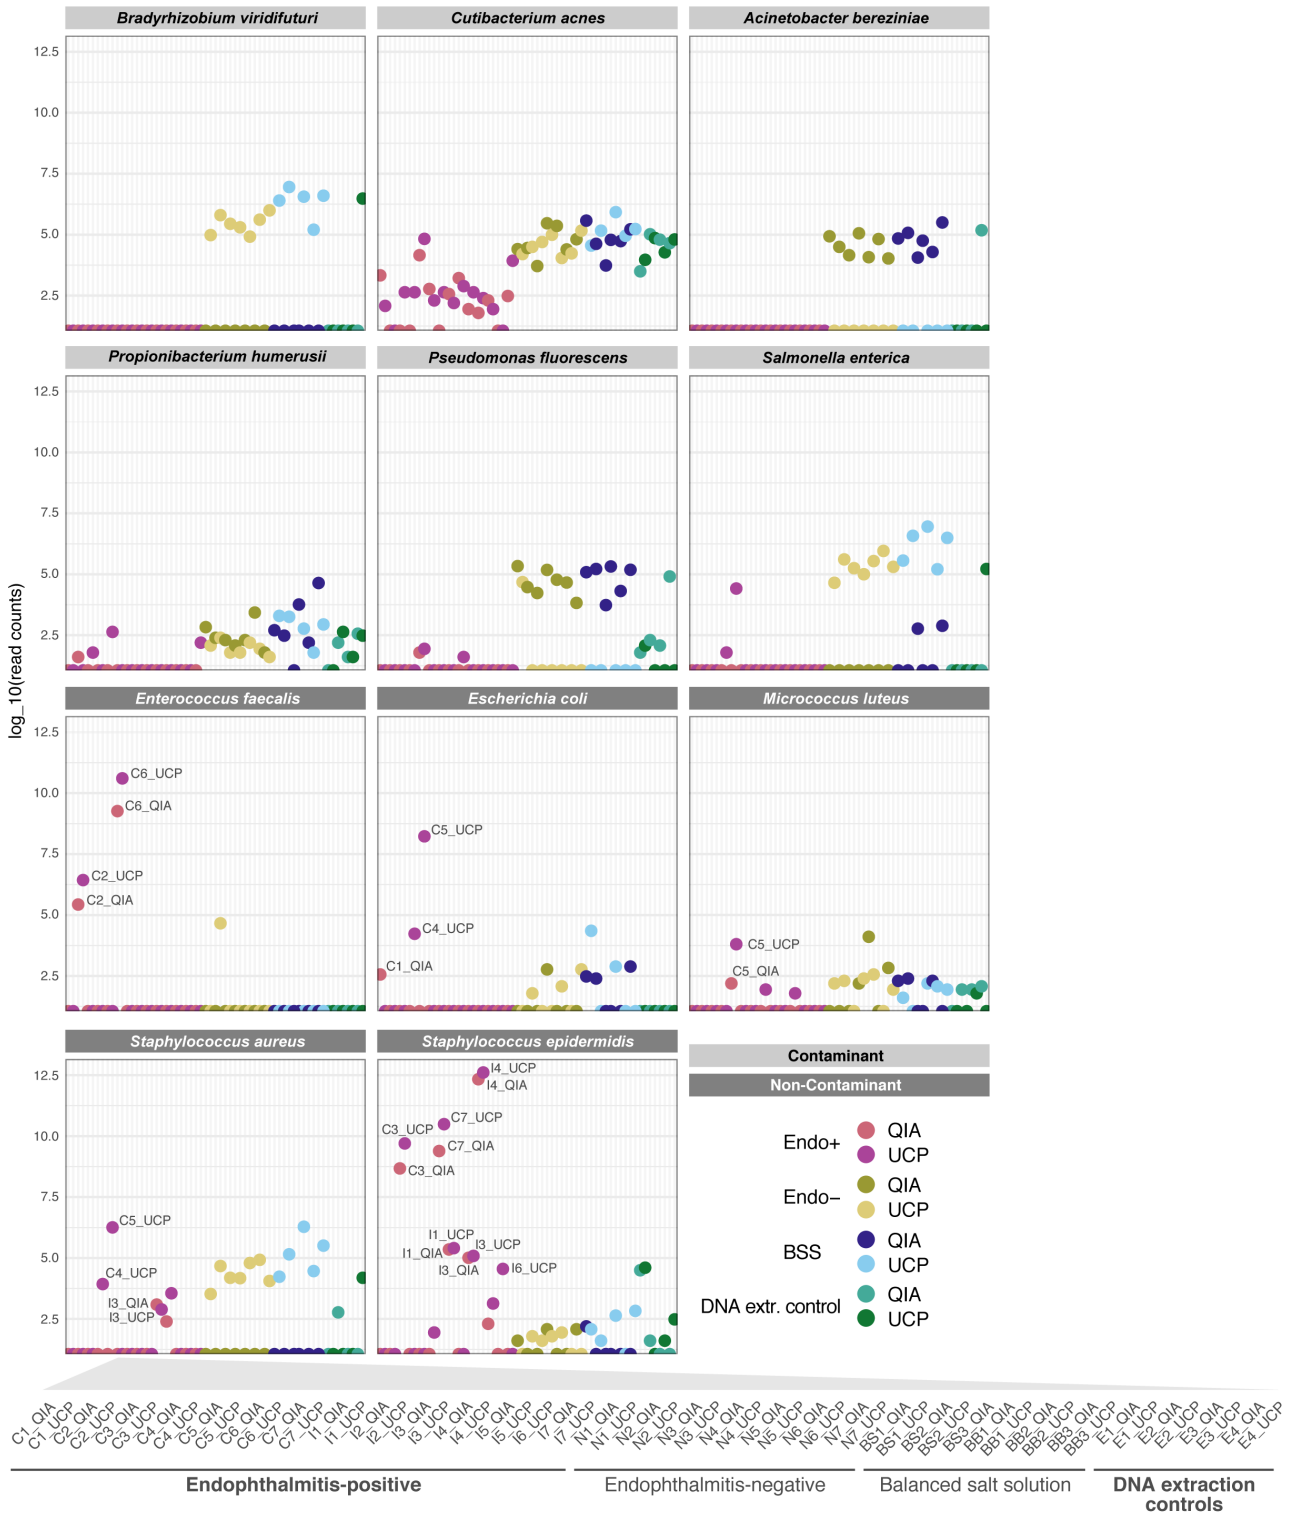

777

778

779

780

781

782

783

**Figure 3: Selected contaminant and non-contaminant organisms based on evaluation of DNA extraction control samples.** Contaminant organisms (light grey) were present in higher abundance in DNA extraction controls (green) compared to the endophthalmitis-positive samples (red). The contaminant organisms were detected in similar abundance in the endophthalmitis-negative (yellow) and/or balanced salt solution

784 samples (blue) as in the DNA extraction control samples. Organisms that were detected in  
785 higher abundance in patient samples (dark grey), compared to their respective DNA  
786 extraction control samples, were not regarded as sample contaminants. Read counts are  
787 presented as counts per million in relation to the total non-human read counts per  
788 sample, respectively. An interactive version of this figure that includes individual sample  
789 information, including read counts, is available from  
790 <https://figshare.com/s/a4fd9d84260e8456ab72>. For a detailed list of contaminant  
791 organisms, see Supplementary Table S5.  
792



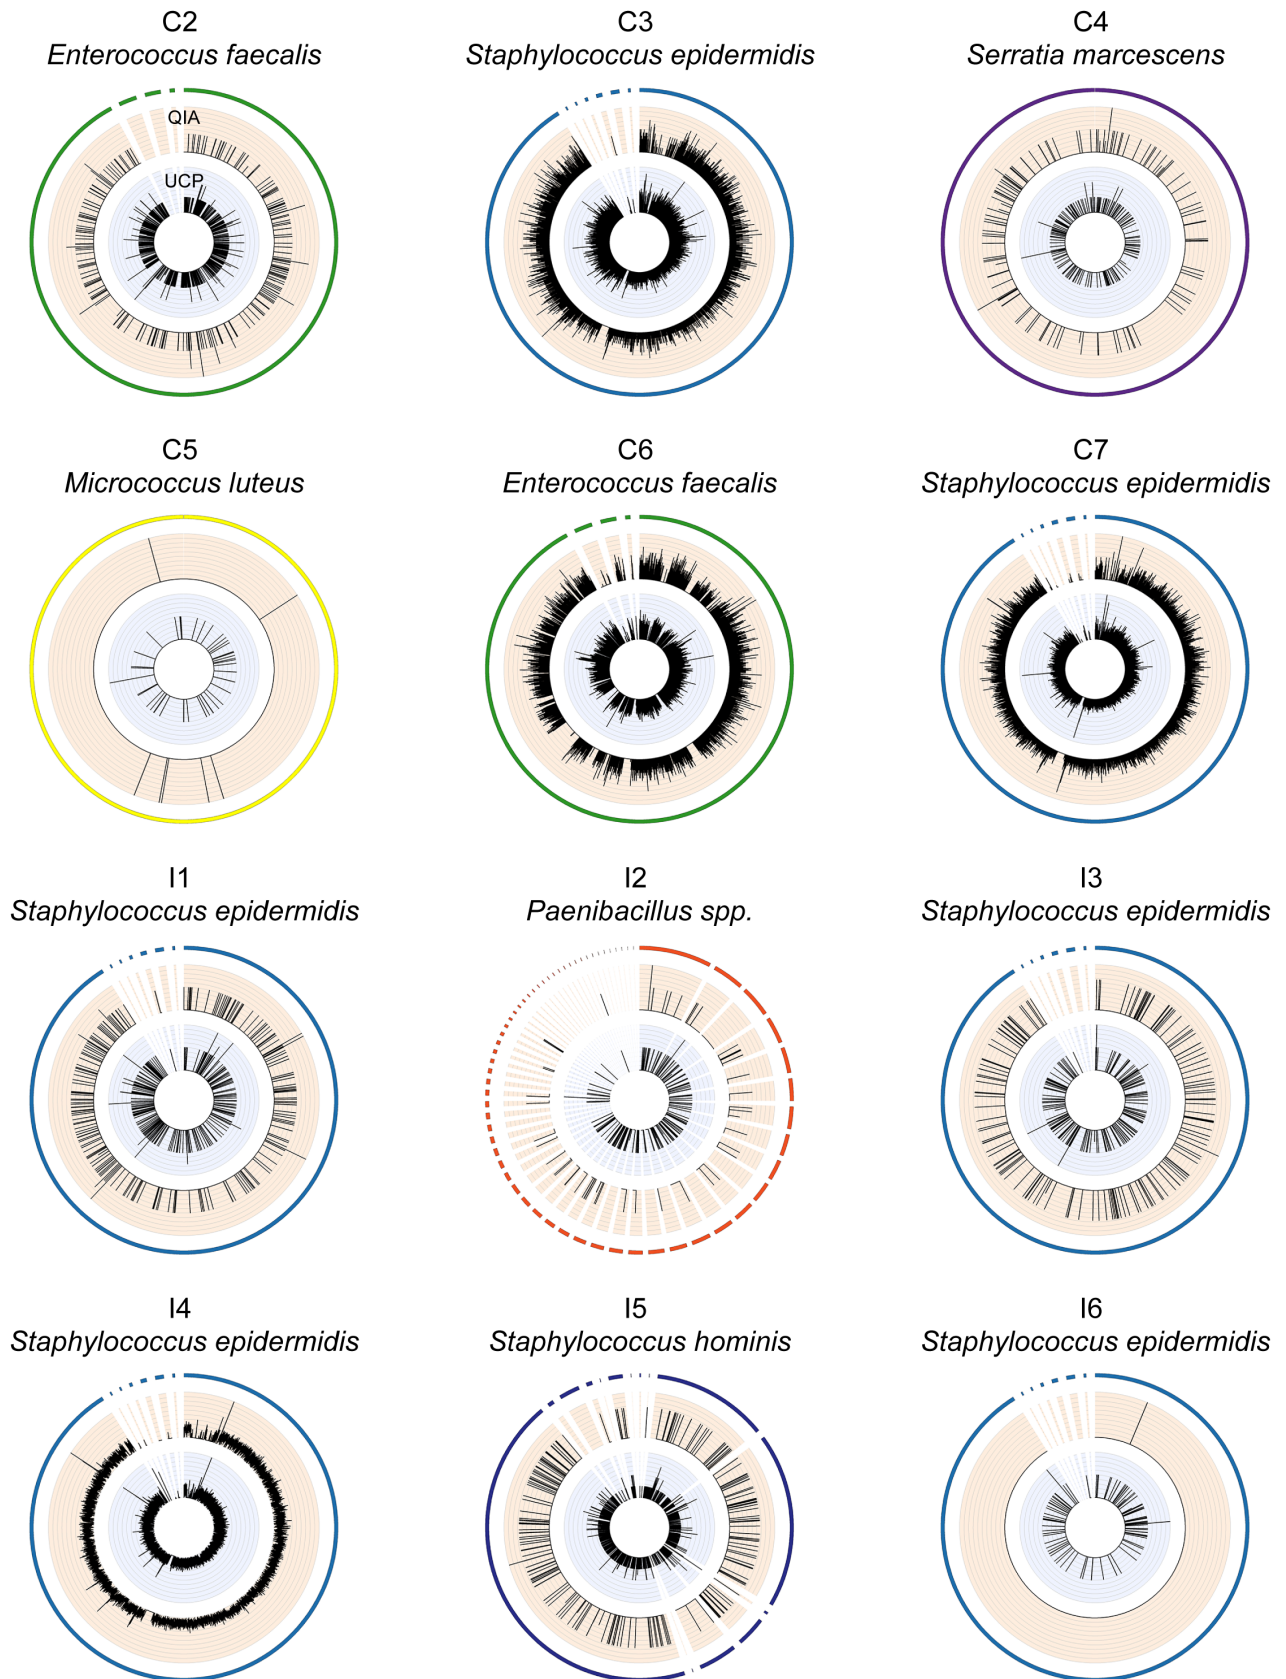

793  
794

795 **Figure 4: Coverage of bacterial reference genomes by metagenomic reads**  
796 **originating from intraocular fluid of endophthalmitis patients.** For each individual  
797 patient, the metagenomic shotgun reads of the most abundant microbial organism were  
798 extracted at genus-level and mapped as unpaired reads using BBmap suite to the  
799 respective reference genome sequence in the database. For patients C1 and I7 a  
800 particular microbial organism could not be assigned confidently in the metagenomics  
801 analysis, and these patients are regarded as “sterile” endophthalmitis cases. The outer  
802 most circle displays all sequences of the reference genome (including short contigs and  
803 plasmids). The orange and blue inner circles display the depth of mapped reads  
804 originating from the vitreous specimens that were extracted with the QIA and UCP DNA  
805 extraction methods, respectively. In the two cases where metagenomics analysis and  
806 culture results from the hospital were not identical regarding the most abundant organism  
807 (patients C5 and I3), we examined the reads via genome mapping for all organisms  
808 detected in the metagenomics analysis. The most relevant abundant organism is shown  
809 here and the additional plots, as well as information about the maximum read depth for all  
810 detected organisms, is available from <https://figshare.com/s/c2ce2d32daf25db54904>.  
811



824 fraction of microbial reads for the most abundant identified organisms based on the  
825 Kraken+Bracken analysis is indicated for both DNA isolation methods. The read counts  
826 for the most abundant organism according to the Kraken+Bracken (all reads) and  
827 BLASTN (forward read) analyses are indicated to the right. The read counts for the most  
828 abundant organisms per sample as determined by Kraken, Bracken, and BLASTn  
829 analyses are available through figshare at <https://figshare.com/s/5feabfad1d8c495bf7a3>.  
830 Bacterial isolates for some samples were obtained in a second round of cultivation at the  
831 research laboratory (2<sup>nd</sup> cultivation), and one representative per colony morphotype per  
832 vitreous sample was subjected to MS and whole genome sequencing (WGS). The  
833 taxonomic affiliation of isolates was determined through classification of assembled  
834 genomes using a k-mer based approach and genomic MLST, and antibiotic resistance  
835 genes were identified using ResFinder. Furthermore, metagenomic assemblies were  
836 generated from the shotgun metagenomic reads and analyzed with regards to taxonomic  
837 affiliation and selected functional characteristics (Supplementary Table S6). A video  
838 summary is available from figshare at <https://figshare.com/s/38fe043f6a8ef1710444>.

839 **Table 1. Ambiguous, including contaminant, sequences in public microbial genomes**  
 840

|          | Total   |                | Ambiguous sequences* |             |           |
|----------|---------|----------------|----------------------|-------------|-----------|
|          | Genomes | Bases          | Genomes              | Bases       | Bases (%) |
| Archaea  | 251     | 673,145,451    | 65                   | 1,813,095   | 0.27      |
| Bacteria | 5166    | 20,854,687,300 | 2251                 | 75,888,994  | 0.36      |
| Fungi    | 225     | 6,486,874,847  | 126                  | 6,642,500   | 0.10      |
| Protozoa | 73      | 2,930,167,033  | 53                   | 26,447,579  | 0.84      |
| Viruses  | 35      | 640,331        | ND                   | ND          | ND        |
| Sum      | 5750    | 30,945,514,962 | 2922                 | 110,858,157 | 0.35      |

841 \*Genomic sequence regions  $\leq 10$  kb (incl. contigs and scaffolds) that had a match (e-value  $\leq 1e-6$ ; query  
 842 coverage  $\geq 70\%$ ) belonging to a different genus than their stated genus definition when aligned against the  
 843 non-redundant nucleotide collection (nt) database from NCBI. For more details, see Supplementary Methods  
 844 and <https://figshare.com/s/a282670f1405eae232df>, <https://figshare.com/s/045b1252bd7555b50ef0>,  
 845 <https://figshare.com/s/c42158cdee23f25489cd>. ND=not determined
